# Supplementary material
Source: PubMed Central journal article supplement (PMC3797568)
Supplement: NIHMS511414-supplement-01.pdf [file NIHMS511414-supplement-01.pdf]

Correlation between Approaches, by Cycle

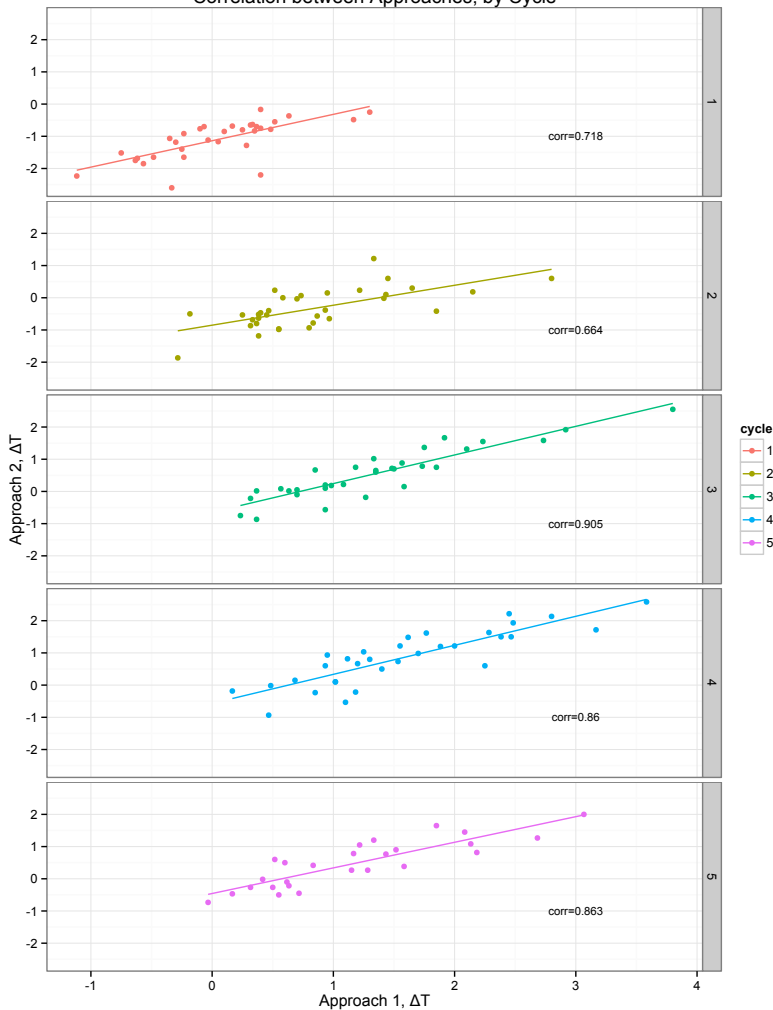

**Supp. Figure 1-** Correlation between the 3-image average  $\Delta T$  obtained with approach 1 and approach 2 is high for every cycle of treatment. Correlation ranges from 0.664 to 0.905. Repeated measures analysis of variance also shows that the two approaches are strongly correlated ( $p < 0.0001$ ).
